# Supplementary material for: Hyperpolarized Xenon-129: A New Tool to Assess Pulmonary Physiology in Patients with Pulmonary Fibrosis
Source: MDPI journal article supplement (doi:10.3390/biomedicines11061533), 2023-05-25
Supplement: s1 [file s1]

## ONLINE SUPPLEMENT FOR

### Hyper-polarized xenon-129 magnetic resonance imaging: A new tool to quantify functional derangement in pulmonary fibrosis

**Supplementary Table S1.** Demographics, diagnostic categories, PFT data and mean CT scores in individual UIP subjects.

| Subjects | Age | Sex | Dx   | UIP basis | PFT (% predicted) |      | Chest HRCT |    |      |
|----------|-----|-----|------|-----------|-------------------|------|------------|----|------|
|          |     |     |      |           | FVC               | DLCO | Ret        | HC | Emph |
| U1       | 73  | M   | IPF  | Path      | 76                | 61   | 16         | 2  |      |
| U2       | 70  | M   | IPF  | Path      | 70                | 57   | 24         | 7  |      |
| U3       | 80  | M   | IPF  | Path      | 75                | 43   | 34         | 31 |      |
| U4       | 38  | F   | DM   | Path      | 32                | 33   | 61         | 29 |      |
| U5       | 79  | F   | IPF  | CT        | 53                | 31   | 31         | 17 |      |
| U6       | 68  | F   | IPF  | CT        | 89                | 59   | 30         | 14 |      |
| U7       | 56  | M   | DM   | Path      | 76                | 60   | 27         | 14 |      |
| U8       | 64  | M   | drug | Path      | 49                | 43   | 32         | 0  |      |
| U9       | 72  | M   | IPF  | CT        | 93                | 66   | 12         | 3  |      |
| U10      | 64  | M   | IPF  | CT        | 68                | 50   | 32         | 15 |      |

Predicted PFT values were calculated using NHANES III reference values.

DLCO, diffusion capacity for carbon monoxide; Dx, diagnosis; FVC, forced vital capacity; HC, honeycomb change; Ret, reticular opacities. None of the UIP subjects had an obstructive ventilatory defect on PFT or mosaic ground glass attenuation on CT.
